# Supplementary material for: Active learning a coarse-grained neural network model for bulk water from sparse training data
Source: Royal Society of Chemistry journal article supplement (doi:10.1039/c9me00184k), 2020-01-01
Supplement: c9me00184k1.pdf [file c9me00184k1.pdf]

## Supporting Information

### Active Learning a Coarse-Grained Neural Network Model for Bulk Water From Sparse Training Data

Troy D. Loeffler<sup>1</sup>, Tarak K. Patra<sup>1,2</sup>, Henry Chan<sup>1,3</sup>, and Subramanian K.R.S.  
Sankaranarayanan<sup>1,3</sup>

1. Center for Nanoscale Materials, Argonne National Laboratory, Argonne, IL 60439, USA
2. Department of Chemical Engineering, Indian Institute of Technology Madras, Chennai, TN 600036, India
3. Department of Mechanical and Industrial Engineering, University of Illinois, Chicago, IL 60607, USA

Neural Network Architecture:

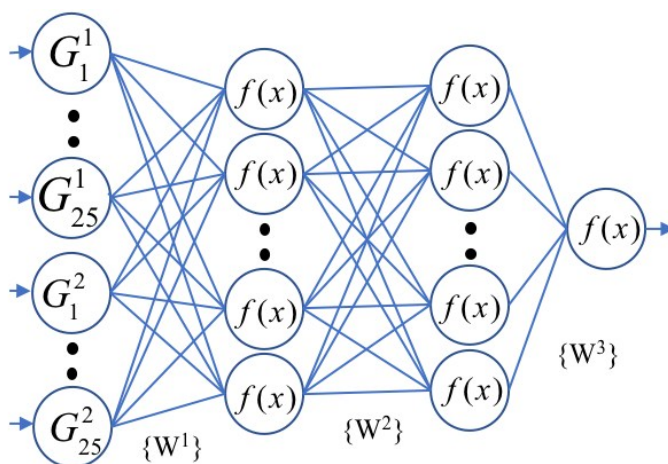

**Figure S1:** Schematic of the NN employed in this work. The network parameters used here was taken from previous work (Appl. Phys. Lett. 115, 193101 (2019)) in order to maintain an accurate comparison between this network and networks trained using more traditional approaches.

### Validation and Training Errors:

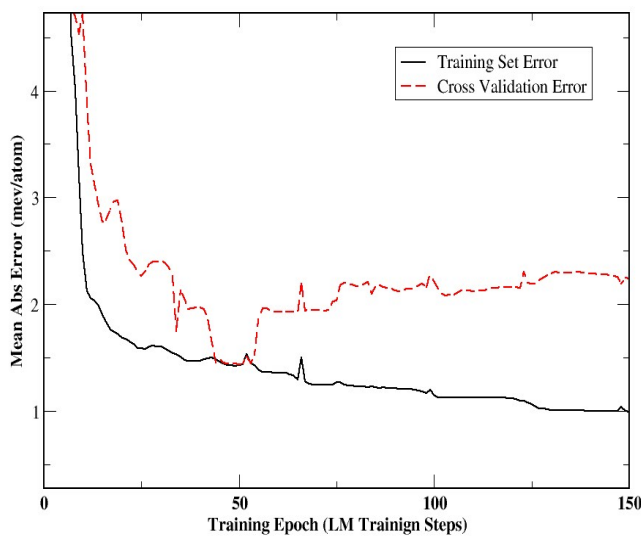

**Figure S2:** Training and validation error as a function of LM training steps during any given AL cycle. The network with the lowest validation error is chosen for the next AL cycle.
